# Supplementary material for: Filaggrin-stratified transcriptomic analysis of pediatric skin identifies mechanistic pathways in patients with atopic dermatitis
Source: PubMed Central journal article supplement (PMC4090750; doi:10.1016/j.jaci.2014.04.021), 2014-07

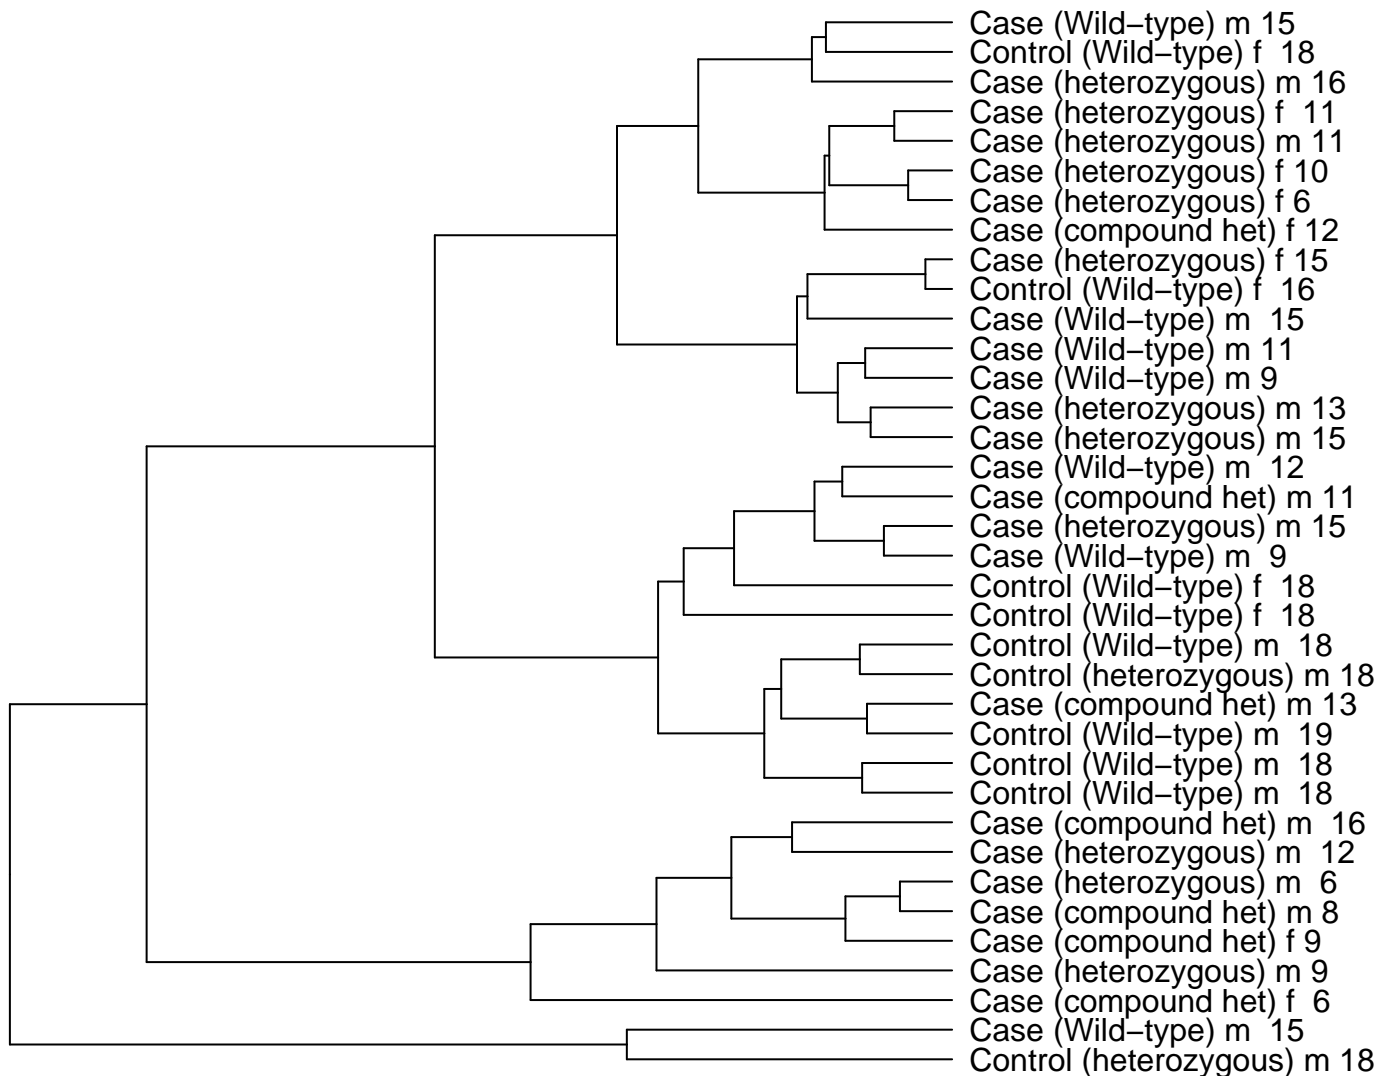

Supplement: mmc13.pdf [file mmc13.pdf]
